# Supplementary material
Source: Springer Nature journal article supplement (https://www.springermedizin.de/resource/supplementary/12985_2010_962_MOESM1_ESM.pdf/9608838)

**C3**  
HCV(-)

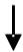

20 21 22 23 24 25 26 27 28

Sept. 2004

**C2**  
HCV(-)

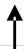

11 12 13 14 15 16 17 18 19 20 21 22 23 24 25 26 27 28 29 30 31 1 2 3

December 2005

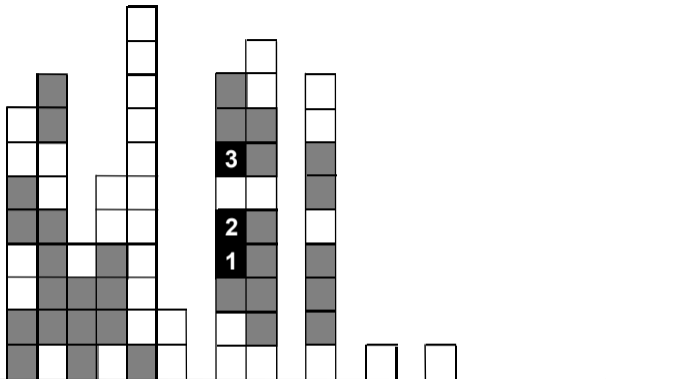

Supplement: MOESM1 [file 9608838]
